# Supplementary material for: An ACACB Variant Implicated in Diabetic Nephropathy Associates with Body Mass Index and Gene Expression in Obese Subjects
Source: PubMed Central journal article supplement (PMC3584087; doi:10.1371/journal.pone.0056193), 2013-02-27
Supplement: pone.0056193.s005.pdf [file pone.0056193.s005.pdf]

Table S1 Association of rs2268388(C/T) with BMI in full-heritage Pima Indian men and women

| Analysis | Gender |                                | CC           | CT          | TT           | p     | p_interaction |
|----------|--------|--------------------------------|--------------|-------------|--------------|-------|---------------|
| Model 1  | Men    | n/N                            | 198/1486     | 57/394      | 4/26         | 0.082 | 0.046         |
|          |        | Adjusted BMI z-score (mean±SE) | 0.225±0.053  | 0.444±0.097 | 0.265±0.352  |       |               |
|          |        | Raw BMI (mean±SD)              | 36.00±8.52   | 37.16±8.01  | 36.68±5.37   |       |               |
|          | Women  | n/N                            | 272/2501     | 105/863     | 6/51         | 0.683 |               |
|          |        | Adjusted BMI z-score (mean±SE) | 0.224±0.049  | 0.347±0.072 | -0.323±0.252 |       |               |
|          |        | Raw BMI (mean±SD)              | 35.90±8.52   | 36.27±8.6   | 34.02±6.89   |       |               |
| Model 2  | Men    | n/N                            | 995/5343     | 331/1765    | 27/129       | 0.478 | 0.435         |
|          |        | Adjusted BMI z-score (mean±SE) | -0.034±0.028 | 0.004±0.045 | -0.004±0.149 |       |               |
|          |        | Raw BMI (mean±SD)              | 34.20±7.89   | 34.38±7.76  | 33.75±8.3    |       |               |
|          | Women  | n/N                            | 1372/9079    | 434/2800    | 38/269       | 0.546 |               |
|          |        | Adjusted BMI z-score (mean±SE) | 0.025±0.025  | 0.078±0.040 | -0.076±0.126 |       |               |
|          |        | Raw BMI (mean±SD)              | 34.20±7.90   | 34.71±8.35  | 33.25±7.03   |       |               |

model 1:  $\geq 1$  nondiabetic exam age  $< 18$  and subsequently developed DM; total n= 642; total exam N= 5321;

P values were adjusted for age, gender, sibship, and repeated exams (matrix: autoregressive; additive genetic model).

model 2: All individuals- all examinations ; total n=3197; total exam N= 19385;

P values were adjusted for age, gender, sibship, diabetic status, duration of diabetes, and repeated exams (matrix: autoregressive; additive genetic model).

T allele is defined as risk allele for higher BMI z-score.

n: number of individuals in each genotypic group. N: number of BMI exams.

P\_interaction refers to p value for genotype\*gender interaction.
